# Supplementary material for: Photoactivatable HNO-releasing compounds using the retro-Diels–Alder reaction
Source: Royal Society of Chemistry journal article supplement (doi:10.1039/b811985f), 2008-01-01

**Electronic Supplementary Information: part 3**

**Photoactivatable HNO-releasing Compounds Using the retro-Diels-Alder Reaction**

Yusuke Adachi, Hidehiko Nakagawa\*, Kazuya Matsuo, Takayoshi Suzuki, and Naoki Miyata\*

*Graduate School of Pharmaceutical Sciences, Nagoya City University, 3-1 Tanabe-dori, Mizuho-ku, Nagoya,  
Aichi 467-8673, Japan*

E-mail: deco@phar.nagoya-cu.ac.jp (H.N.), and miyata-n@phar.nagoya-cu.ac.jp (N.M.)

**<NMR charts>**

**Contents**

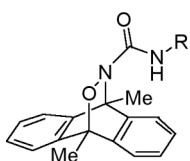

- 1:** R = 4-nitrophenyl
- 2:** R = H
- 3:** R = 4-nitrobenzyl
- 4:** R = 3-nitrophenyl
- 5:** R = 4'-nitrobiphenyl
- 6:** R = 4'-nitrostyryl

Chart S3-1: Compound **1**, <sup>1</sup>H-NMR

Chart S3-2: Compound **1**, <sup>13</sup>C-NMR

Chart S3-3: Compound **2**, <sup>1</sup>H-NMR

Chart S3-4: Compound **2**, <sup>13</sup>C-NMR

Chart S3-5: Compound **3**, <sup>1</sup>H-NMR

Chart S3-6: Compound **3**, <sup>13</sup>C-NMR

Chart S3-7: Compound **4**, <sup>1</sup>H-NMR

Chart S3-8: Compound **4**, <sup>13</sup>C-NMR

Chart S3-9: Compound **5**, <sup>1</sup>H-NMR

Chart S3-10: Compound **5**, <sup>13</sup>C-NMR-1 (accumulation for 2 hr)

Chart S3-11: Compound **5**, <sup>13</sup>C-NMR-2 (accumulation for 13 hr 45 min). Due to the long time accumulation need to identify quaternary carbon atoms of the compound, the carbon signals attributed to the thermal decomposition products, 4-(4'-nitrophenyl)aniline and 9,10-dimethylanthracene, appeared in this charts even under the isothermal control (at 20°C for DMSO-d<sub>6</sub> solvent). These thermal decomposition products were substantially not observed in the chart accumulated for 2 hr (Chart S3-10).

Chart S3-12: Compound **6**, <sup>1</sup>H-NMR

Chart S3-1

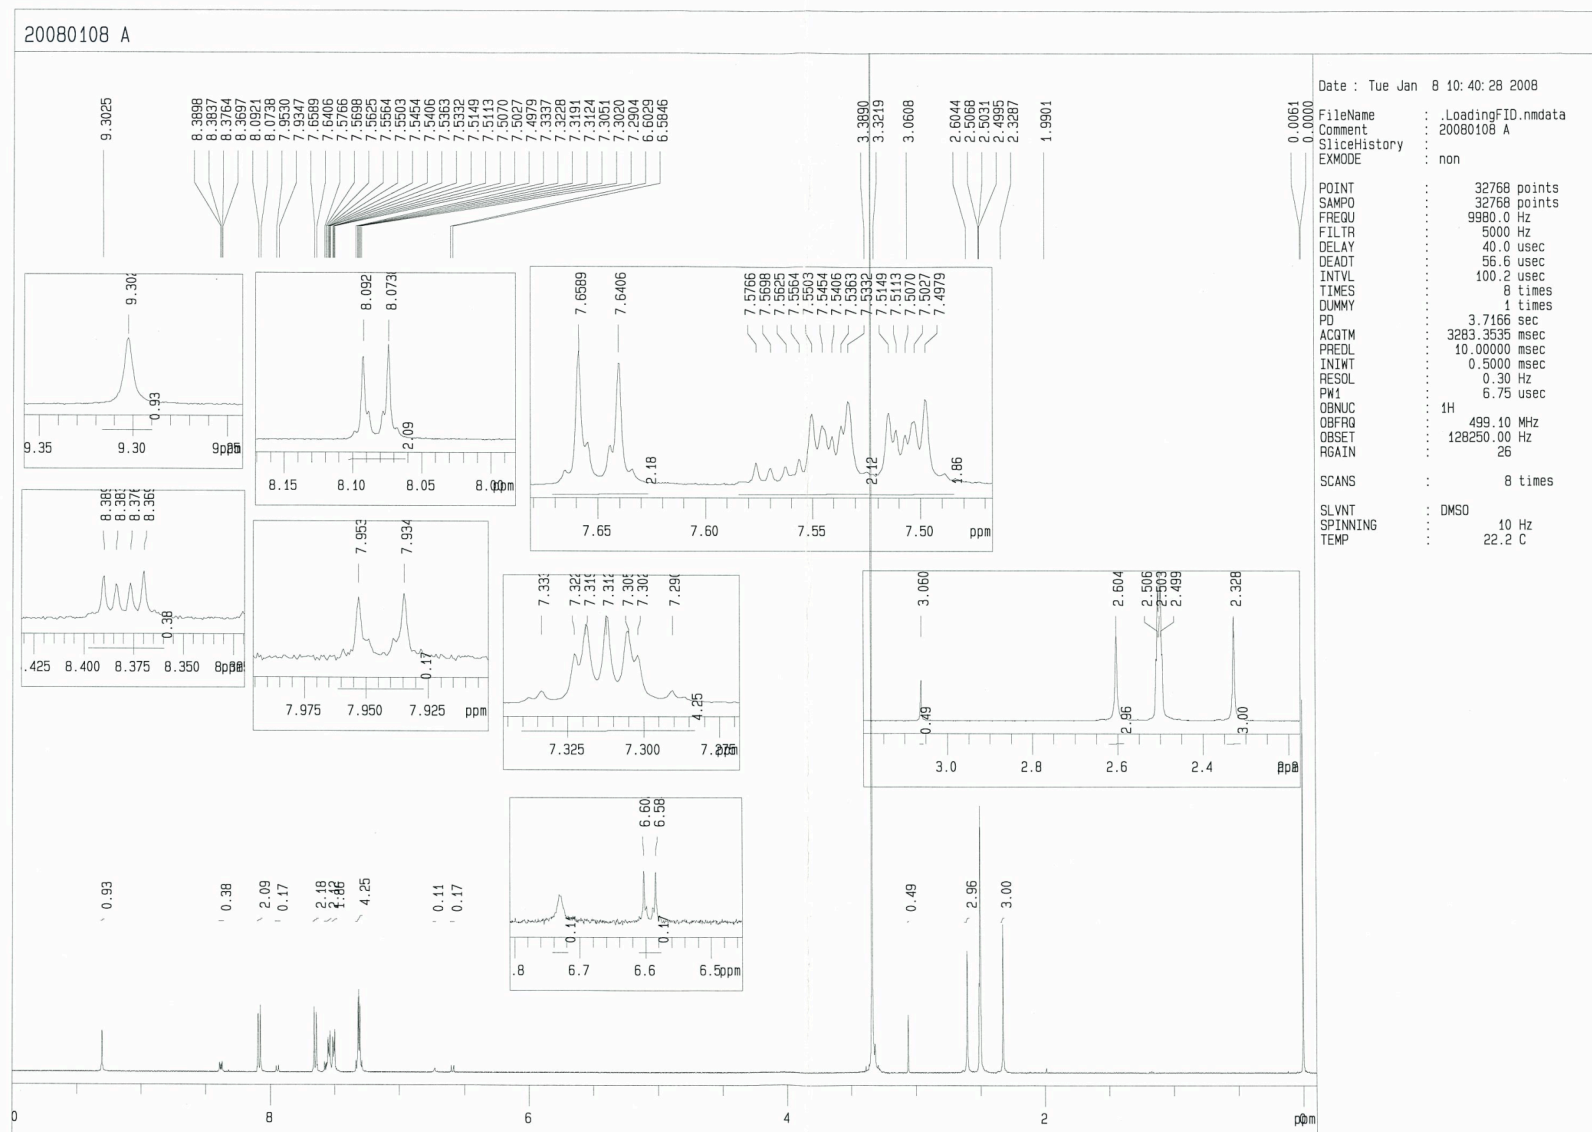

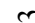

Chart S3-3

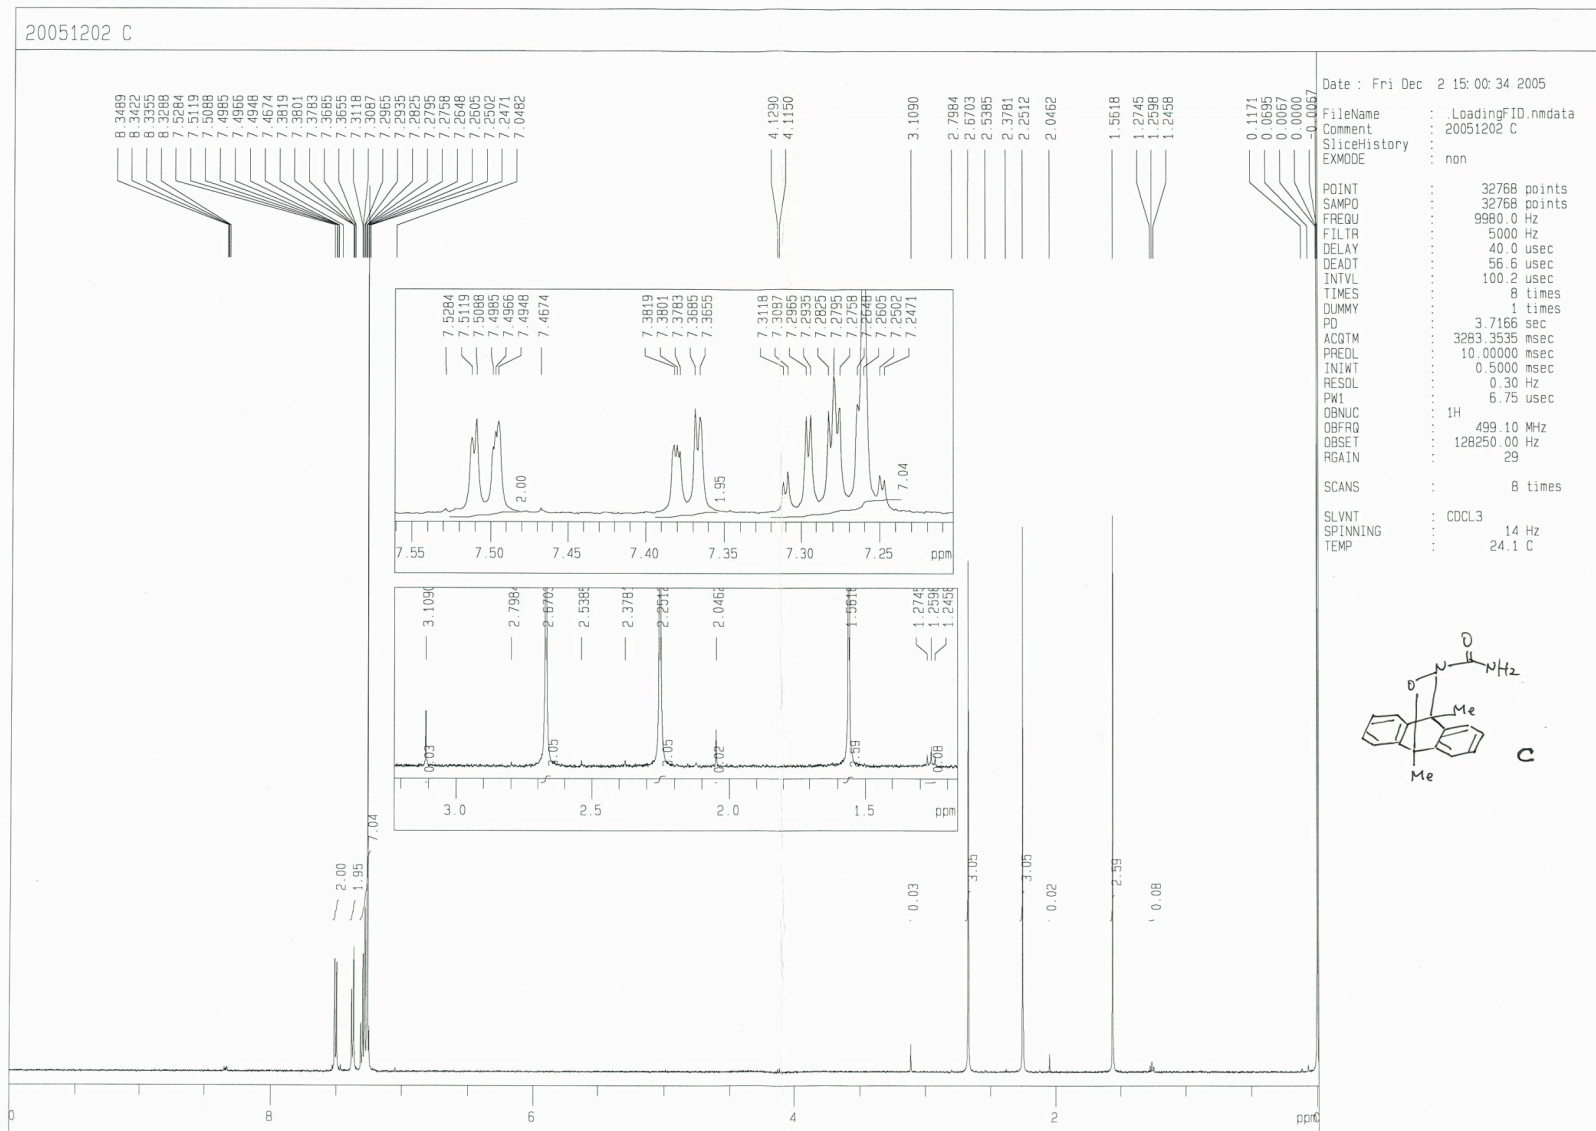



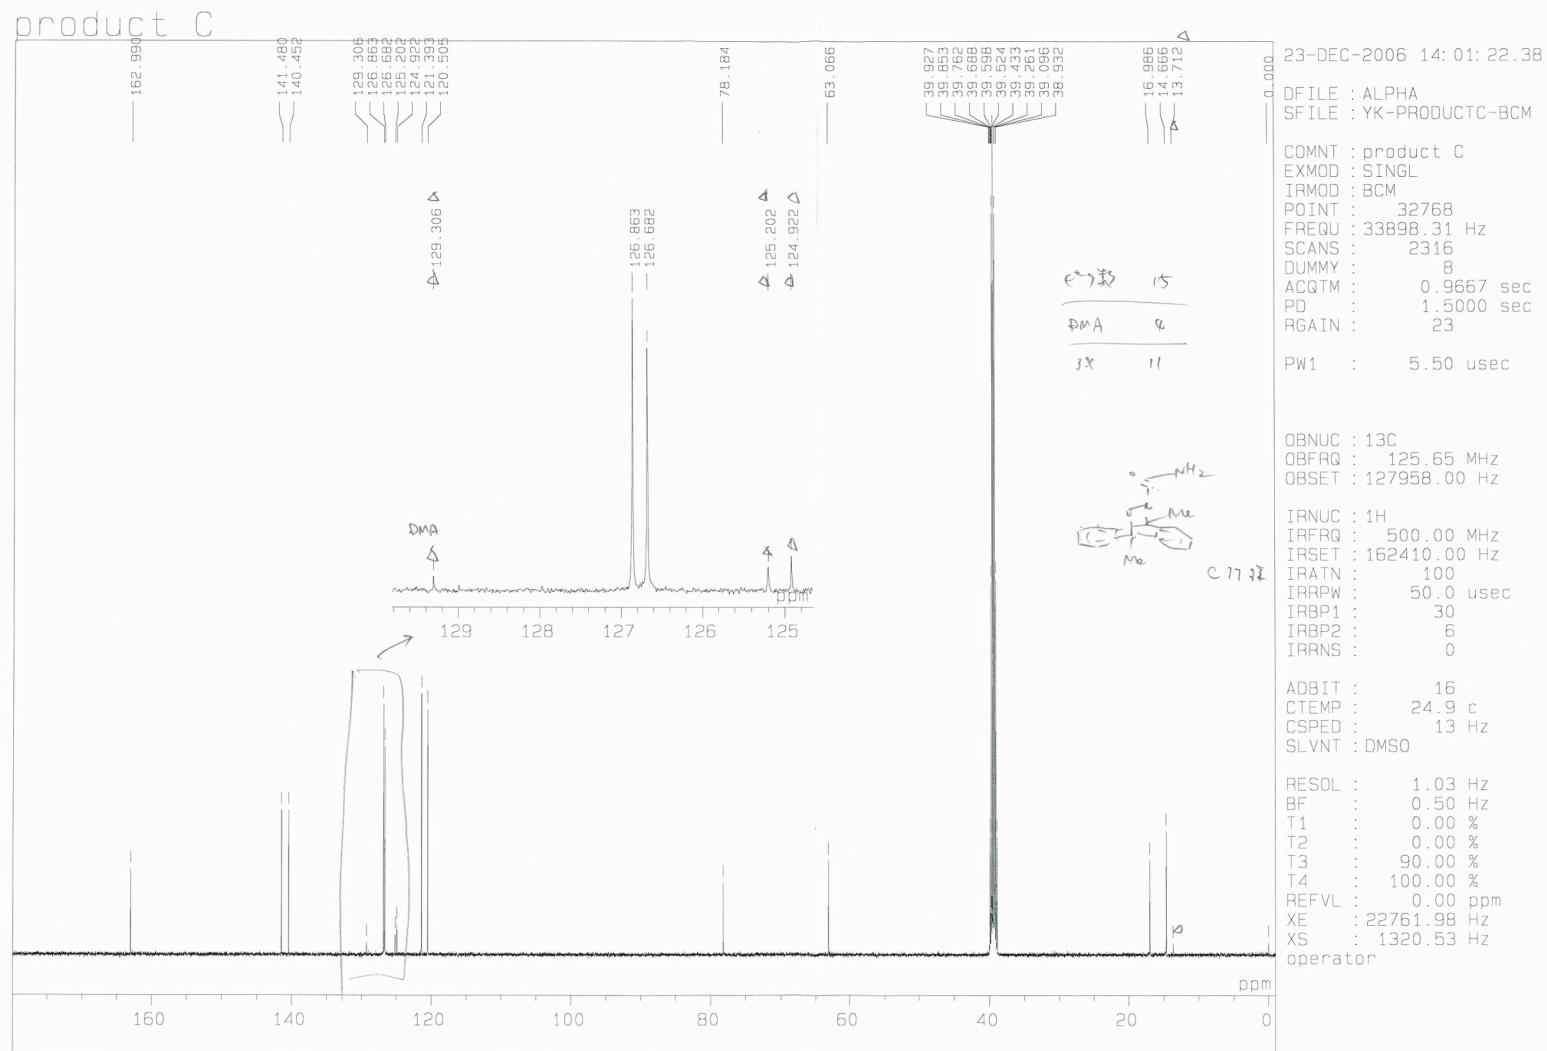

Chart S3-4

Chart S3-5

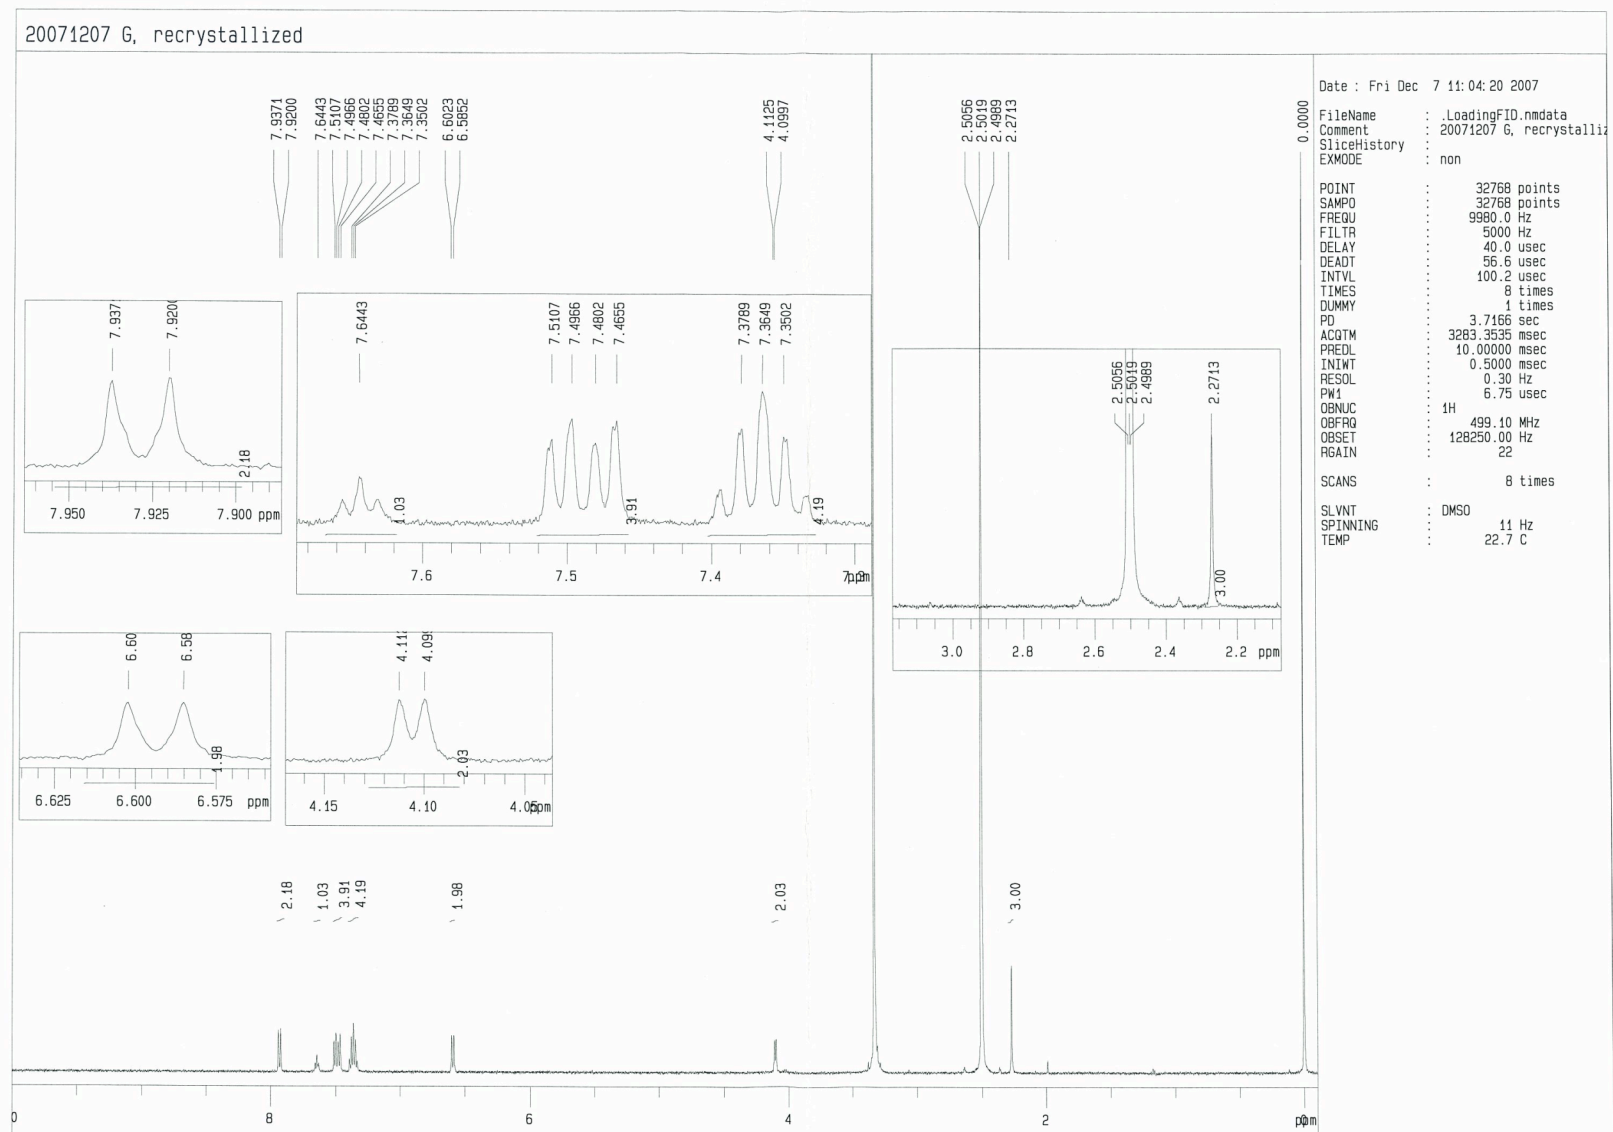

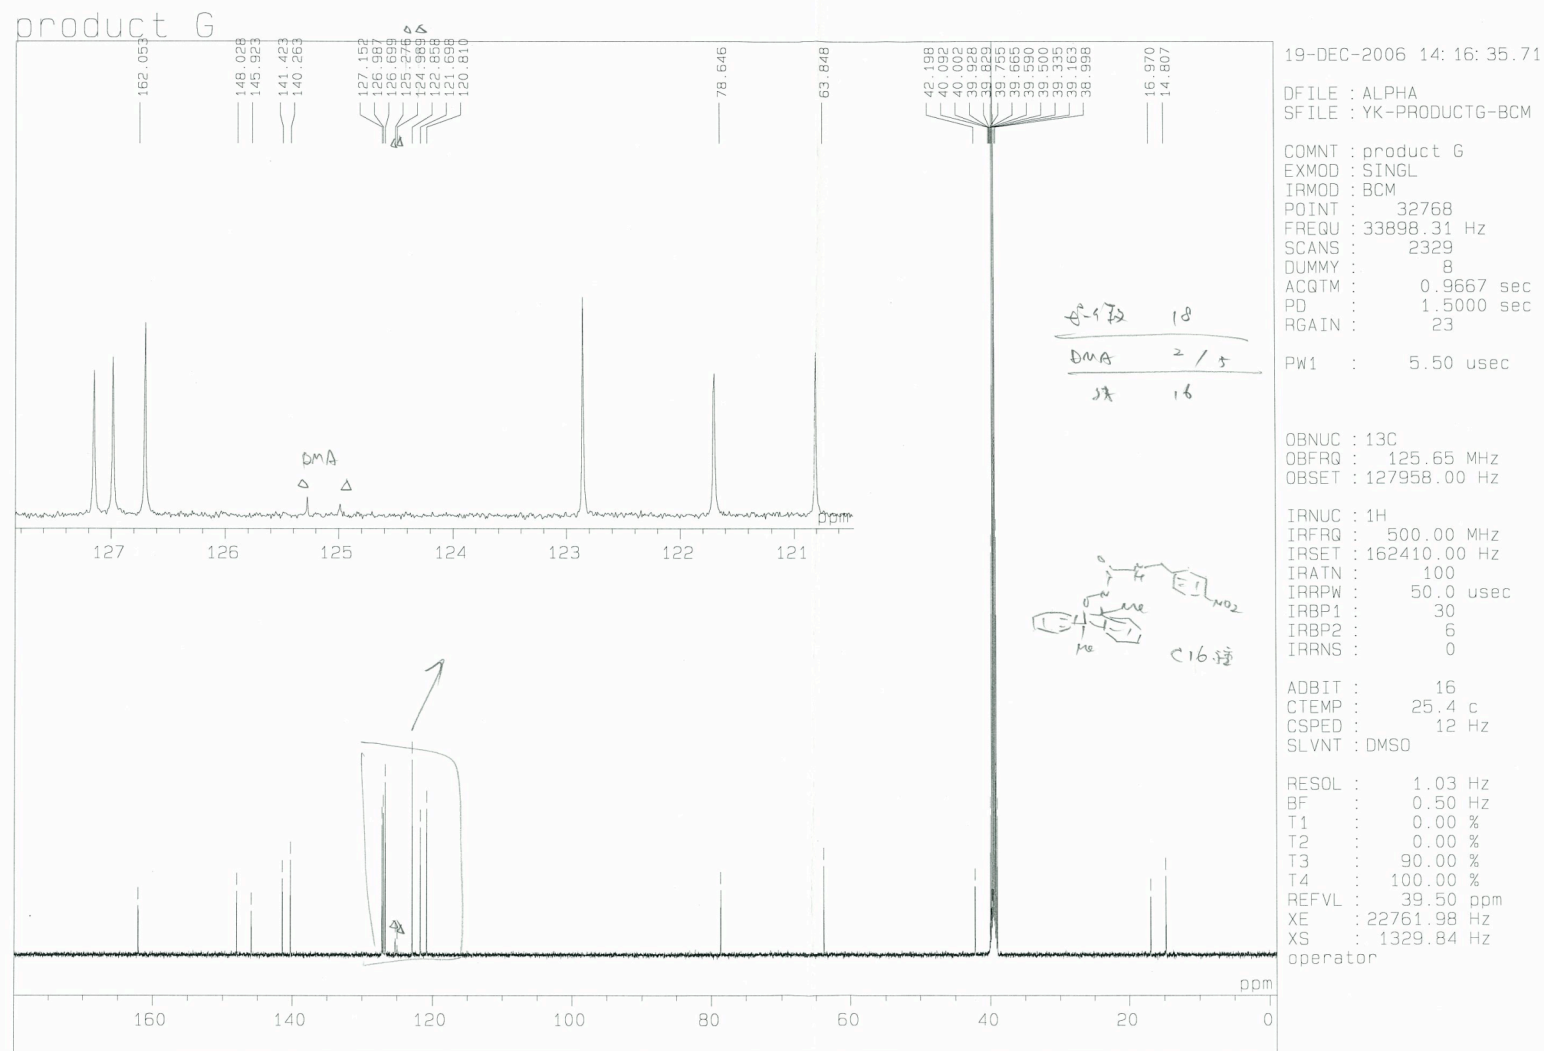

Chart S3-6

Chart S3-7

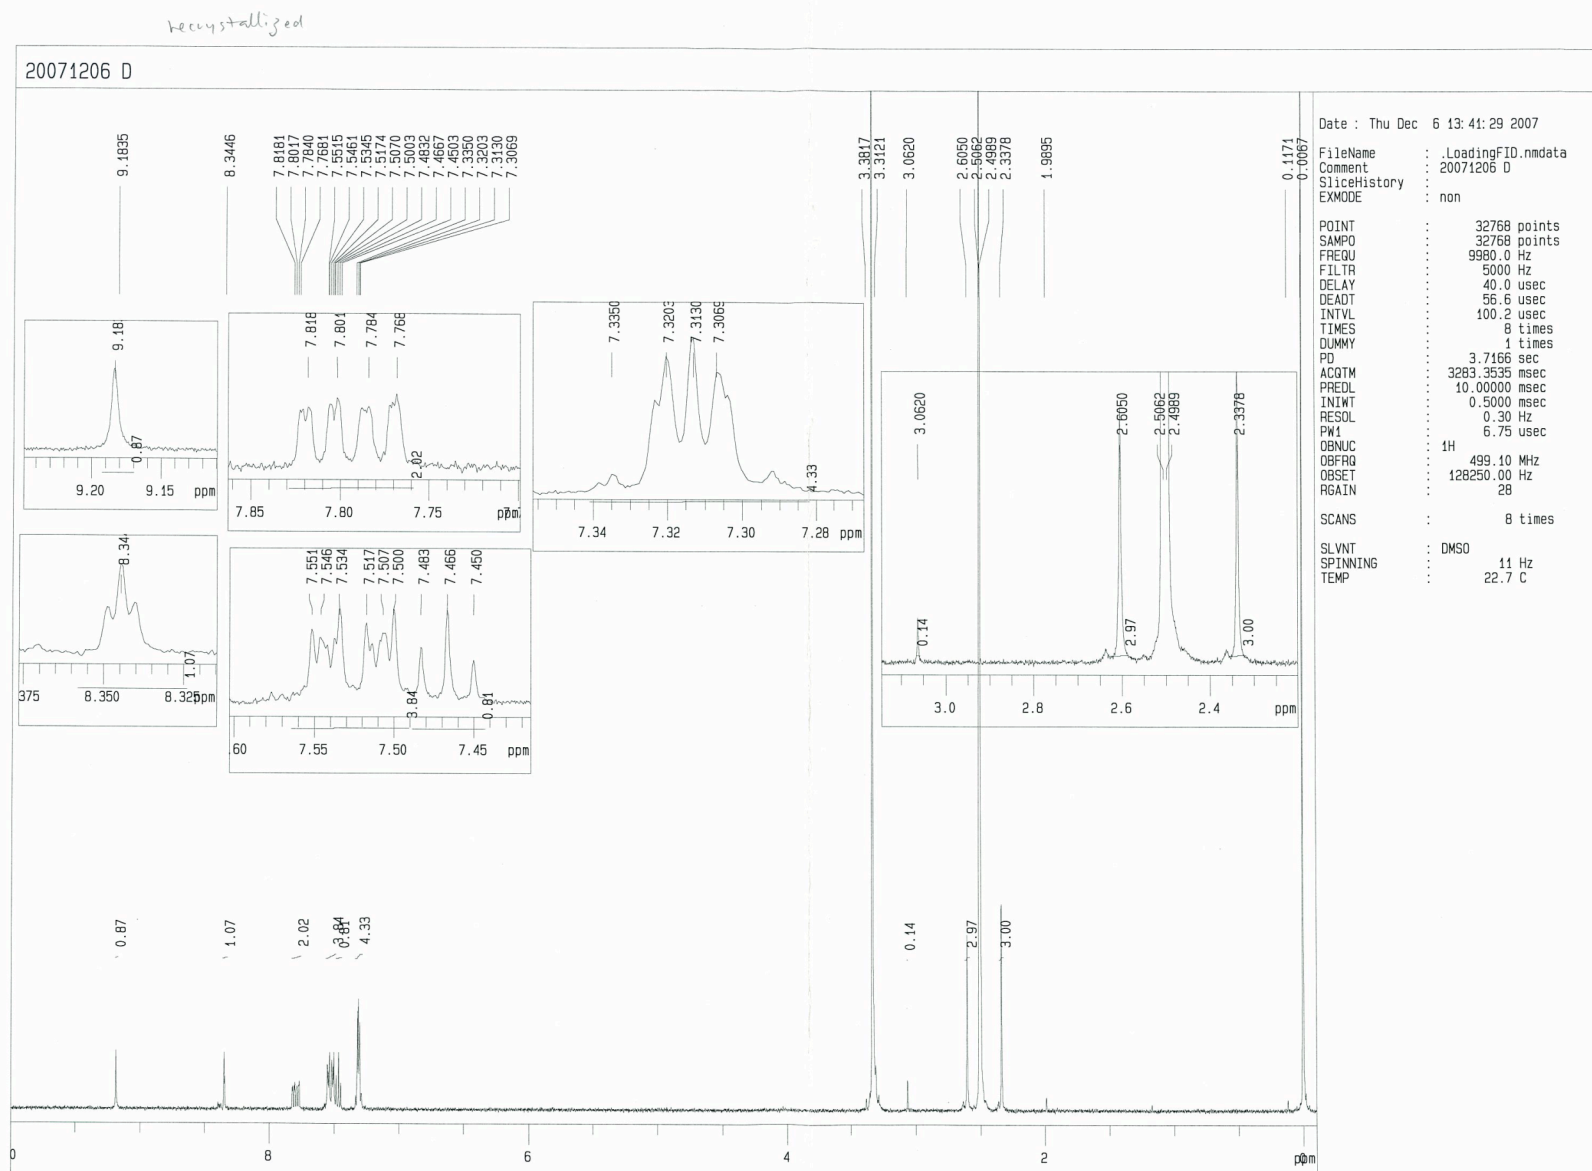

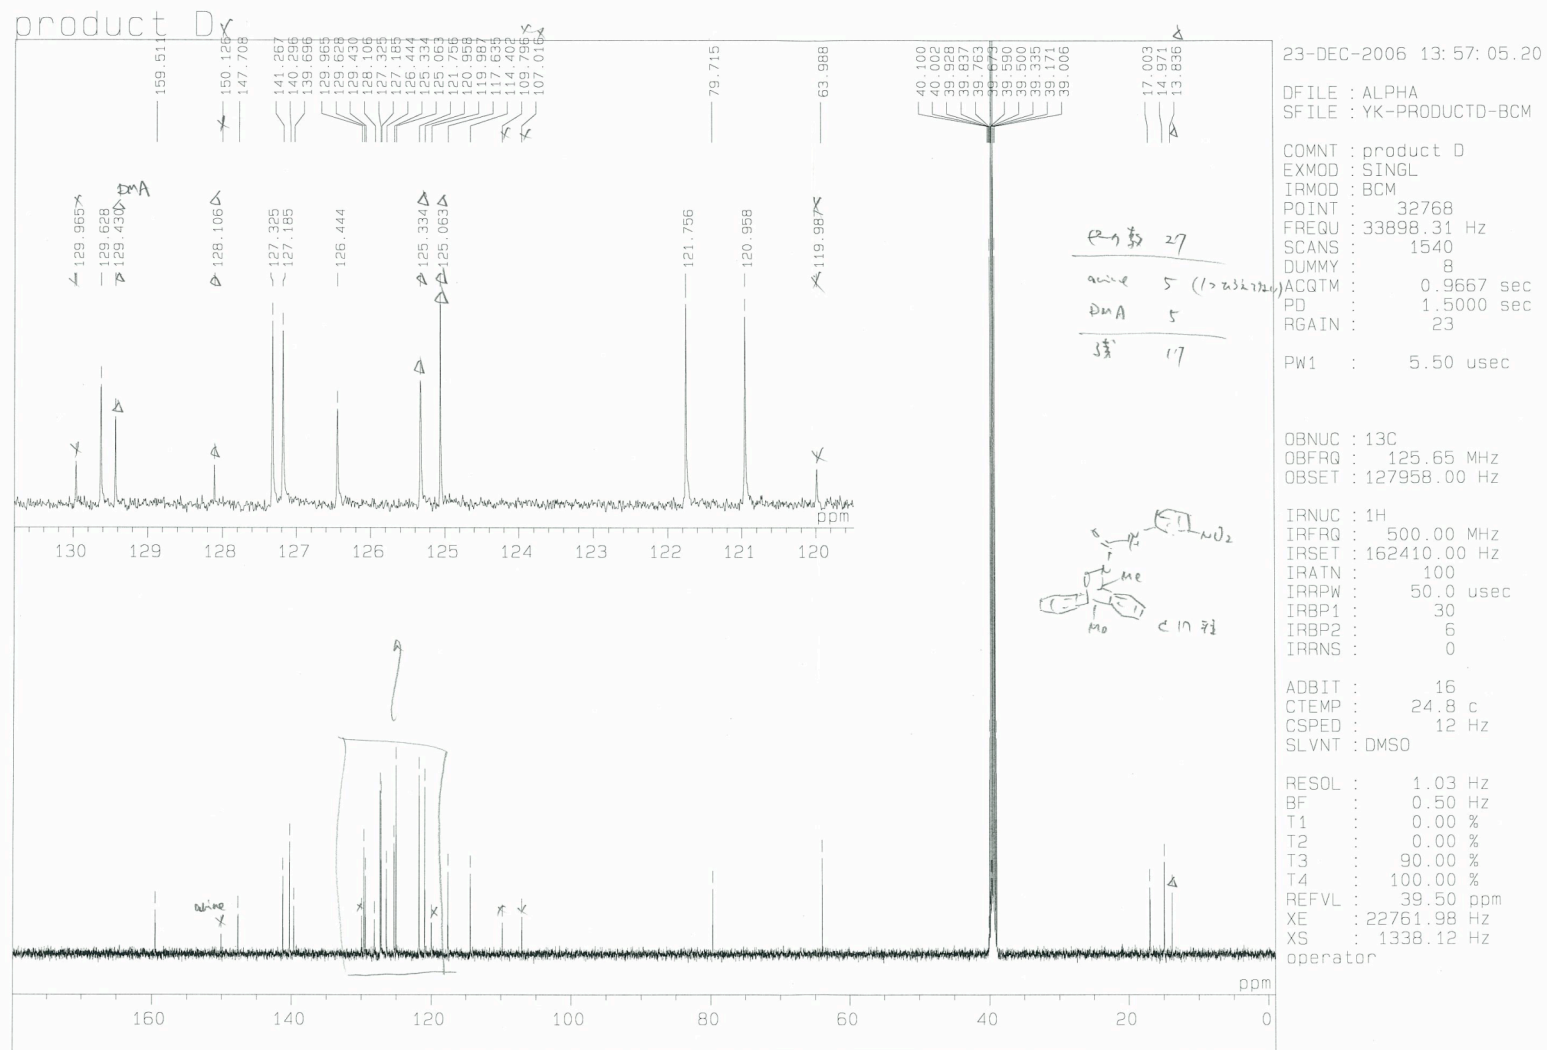

Chart S3-9

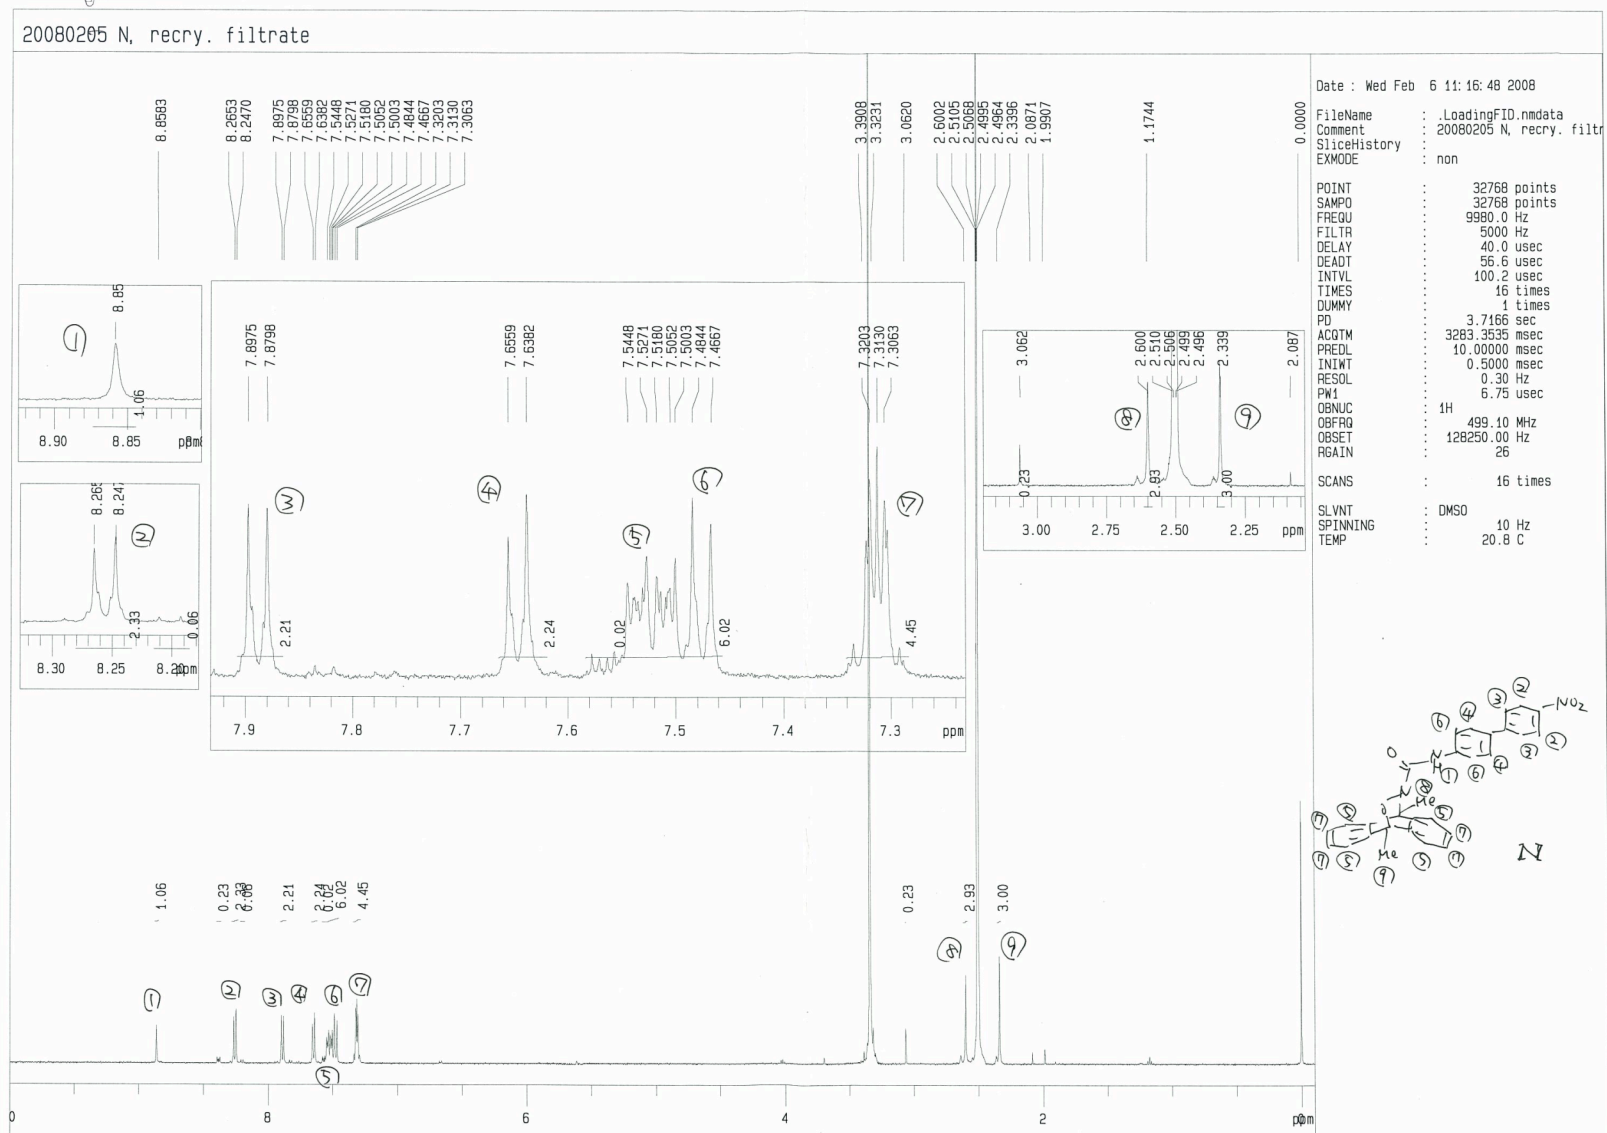



product N/carbon

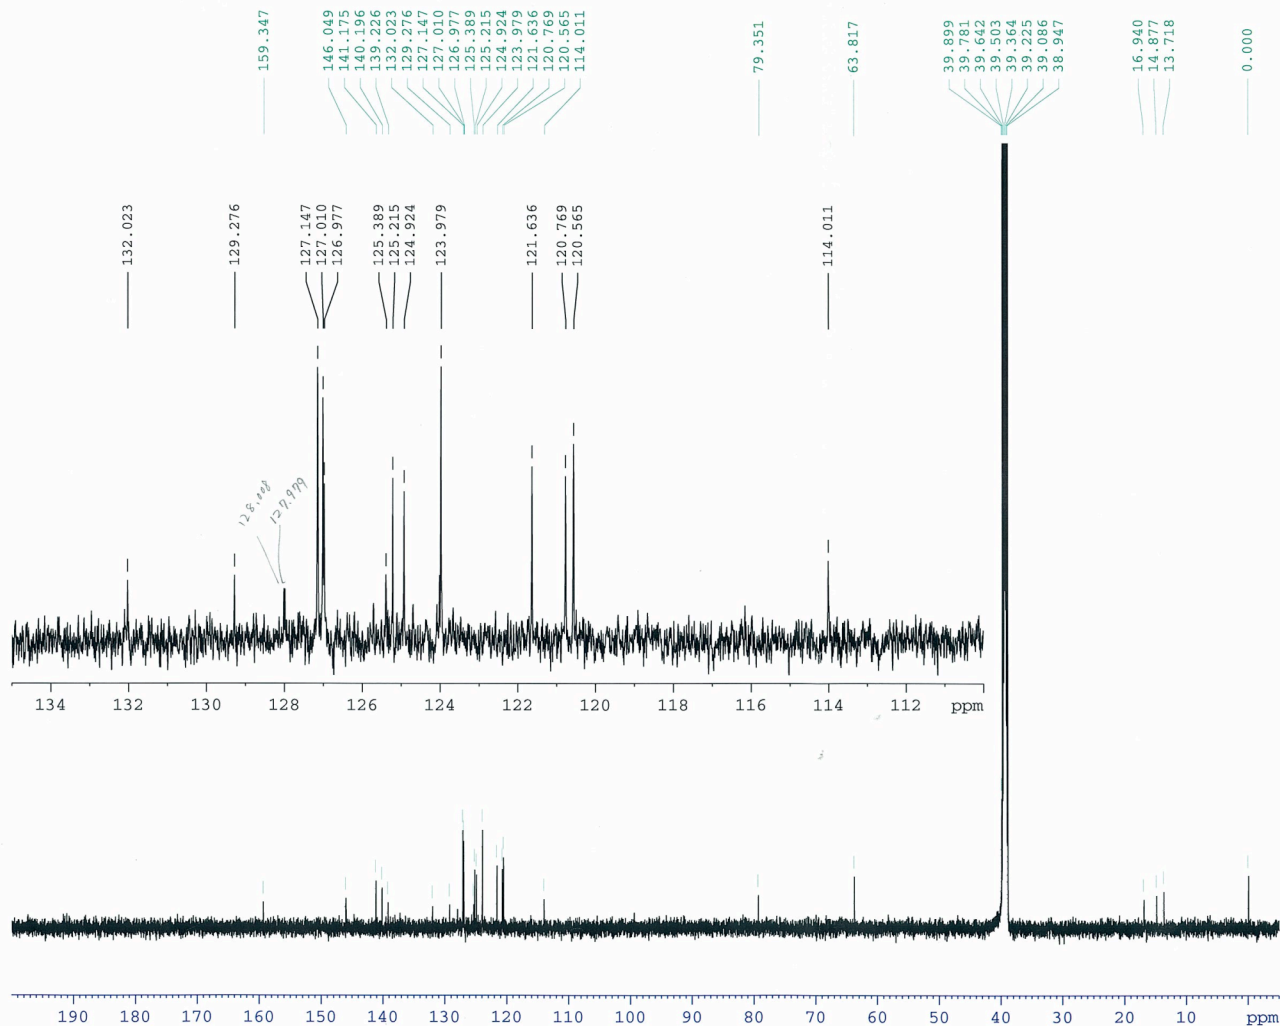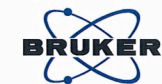

Current Data Parameters  
NAME yk\_matsuo  
EXPNO 1  
PROCNO 1

F2 - Acquisition Parameters  
Date\_ 20080512  
Time 10.24  
INSTRUM spect  
PROBHD 5 mm PABBO BB-  
PULPROG zgpg30  
TD 65536  
SOLVENT DMSO  
NS 2873  
DS 4  
SWH 35971.223 Hz  
FIDRES 0.548877 Hz  
AQ 0.9110143 sec  
RG 20642.5  
DW 13.900 usec  
DE 25.00 usec  
TE 293.0 K  
D1 1.50000000 sec  
d11 0.03000000 sec  
DELTA 1.39999998 sec  
MCREST 0.00000000 sec  
MCWRK 0.01500000 sec

===== CHANNEL f1 =====  
NUC1 13C  
P1 4.00 usec  
PL1 1.00 dB  
SFO1 150.9178988 MHz

===== CHANNEL f2 =====  
CPDPRG2 waltz16  
NUC2 1H  
PCPD2 80.00 usec  
PL2 -6.00 dB  
PL12 12.00 dB  
PL13 12.00 dB  
SFO2 600.1324005 MHz

F1 - Acquisition parameters  
ND0 2  
TD 128  
SFO1 600.1333 MHz  
FIDRES 44.796444 Hz  
SW 9.554 ppm  
FMODE QF

F2 - Processing parameters  
SI 32768  
SF 150.9028962 MHz  
WDW EM  
SSB 0  
LB 1.00 Hz  
GB 0  
PC 1.40

F1 - Processing parameters  
SI 1024  
MC2 QF  
SF 600.1300047 MHz  
WDW nc  
SSB 0  
LB 0.30 Hz  
GB 0.1



product N/carbon

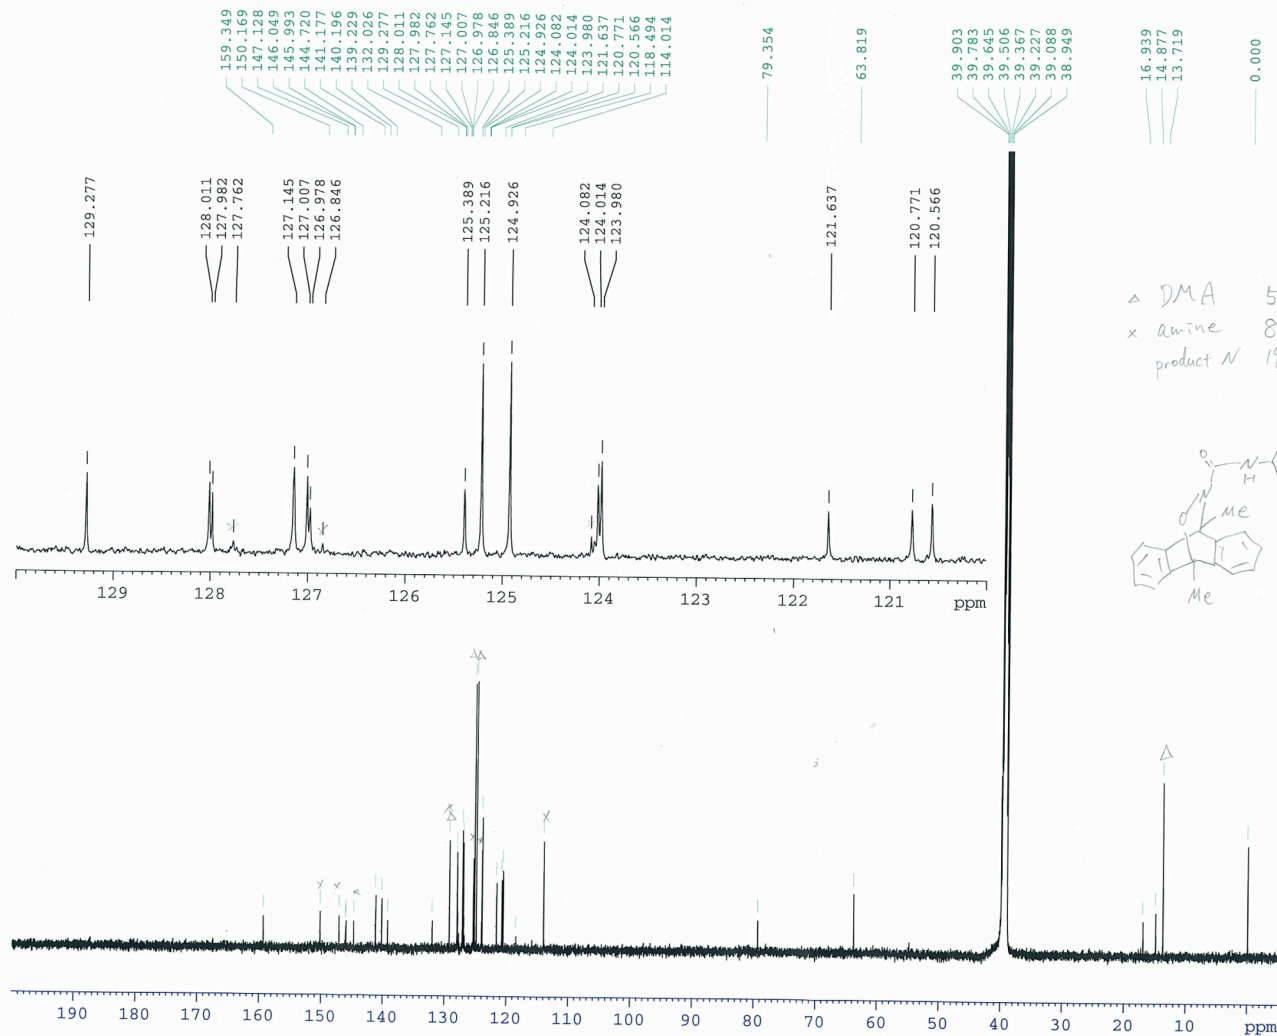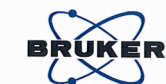

Current Data Parameters  
NAME yk\_matsuo  
EXPNO 4  
PROCNO 1

F2 - Acquisition Parameters  
Date\_ 20080513  
Time 4.16  
INSTRUM spect  
PROBHD 5 mm PABBO BB-  
PULPROG zgpg30  
TD 65536  
SOLVENT DMSO  
NS 2000  
DS 4  
SWH 35971.223 Hz  
FIDRES 0.548877 Hz  
AQ 0.9110143 sec  
RG 20642.5  
DW 13.900 usec  
DE 25.00 usec  
TE 293.0 K  
D1 1.50000000 sec  
d11 0.03000000 sec  
DELTA 1.39999998 sec  
MCREST 0.00000000 sec  
MCWRK 0.01500000 sec

===== CHANNEL f1 =====  
NUC1 13C  
P1 4.00 usec  
PL1 -1.00 dB  
SFO1 150.9178988 MHz

===== CHANNEL f2 =====  
CPDPRG2 waltz16  
NUC2 1H  
PCPD2 80.00 usec  
PL2 -6.00 dB  
PL12 12.00 dB  
PL13 12.00 dB  
SFO2 600.1324005 MHz

F2 - Processing parameters  
SI 32768  
SF 150.9028959 MHz  
WDW EM  
SSB 0  
LB 1.00 Hz  
GB 0  
PC 1.40

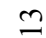

Supplement: b811985f-3.pdf [file b811985f-3.pdf]
